# Supplementary material for: Assessment of violet-blue color formation in Phalaenopsis orchids
Source: PubMed Central journal article supplement (PMC7218627; doi:10.1186/s12870-020-02402-7), 2020-05-12
Supplement: 12870_2020_2402_MOESM1_ESM.pdf [file 12870_2020_2402_MOESM1_ESM.pdf]

|                 |                                                                                     |                                                                                     |                                                                                     |                                                                                       |                                                                                     |
|-----------------|-------------------------------------------------------------------------------------|-------------------------------------------------------------------------------------|-------------------------------------------------------------------------------------|---------------------------------------------------------------------------------------|-------------------------------------------------------------------------------------|
|                 |    |    |    |    |  |
| <b>Cultivar</b> | <i>P. OX</i><br>Brother Seamate<br>'OX1313'                                         | <i>P. OX</i> Honey<br>'OX1372'                                                      | <i>P. OX</i><br>Firebird<br>'OX1506<br>mutant'                                      | <i>P. hybrid</i><br>'King Car'                                                        | <i>P. Big Chili</i>                                                                 |
| <b>RHSCC</b>    | red-purple<br>71A                                                                   | purple<br>75A                                                                       | purple<br>77A                                                                       | purple<br>N78C                                                                        | purple-violet<br>N80A                                                               |
|                 |    |    |    |    |  |
| <b>Cultivar</b> | <i>P. violacea</i><br>'indigo blue'                                                 | <i>P. (Germaine Vincen x Samera</i><br>'indigo') "S304"                             | <i>P. (Kenneth Schubert x Samera)</i><br>'KS1226'                                   | <i>P. Tau Chiang Sapphire</i>                                                         | <i>P. Purple Martin</i>                                                             |
| <b>RHSCC</b>    | violet<br>86A                                                                       | violet<br>87A                                                                       | violet<br>N87B                                                                      | violet-blue<br>90A                                                                    | violet-blue<br>90B                                                                  |
|                 |  |  |  |  |                                                                                     |
| <b>Cultivar</b> | <i>P. Kenneth Schubert</i>                                                          | <i>P. aphrodite</i><br>subsp.<br><i>formosana</i>                                   | <i>P. Sogo Yukidian</i><br>'V3'                                                     | <i>Delphinium</i><br>hybrid                                                           |                                                                                     |
| <b>RHSCC</b>    | violet-blue<br>92A                                                                  | white<br>NN155C                                                                     | white<br>NN155C                                                                     | blue<br>101A                                                                          |                                                                                     |

**Additional file 1.** Flowers used in this study, and their definition of color code.

Flower color of *Phalaenopsis* cultivars and *Delphinium* hybrid were assigned according to the RHSCC.
