# Supplementary material for: Assessment of violet-blue color formation in Phalaenopsis orchids
Source: PubMed Central journal article supplement (PMC7218627; doi:10.1186/s12870-020-02402-7), 2020-05-12
Supplement: 12870_2020_2402_MOESM2_ESM.pdf [file 12870_2020_2402_MOESM2_ESM.pdf]

(A)

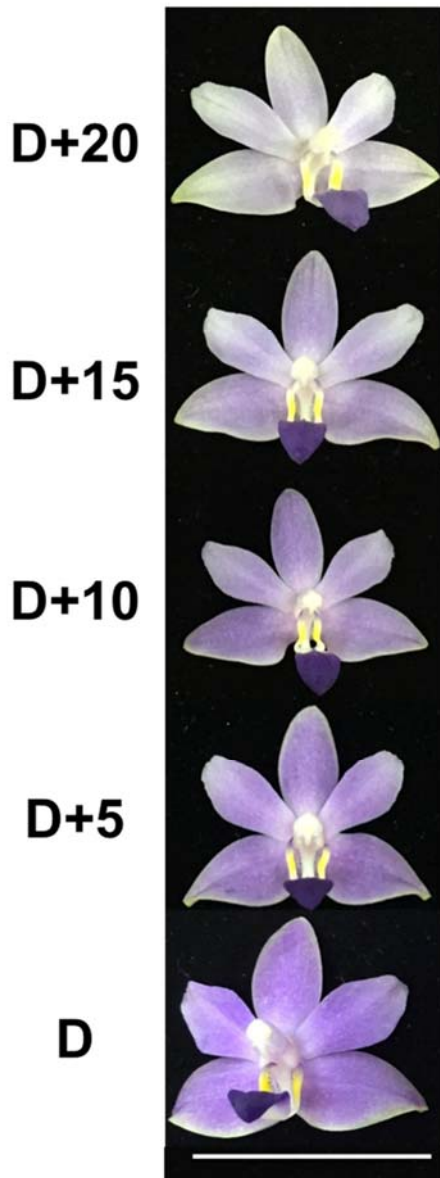

(B)

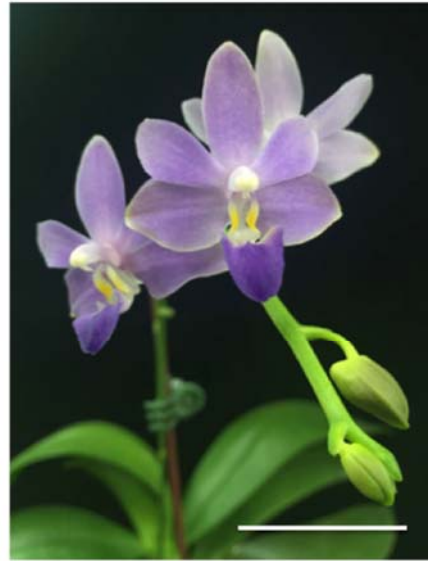

(C)

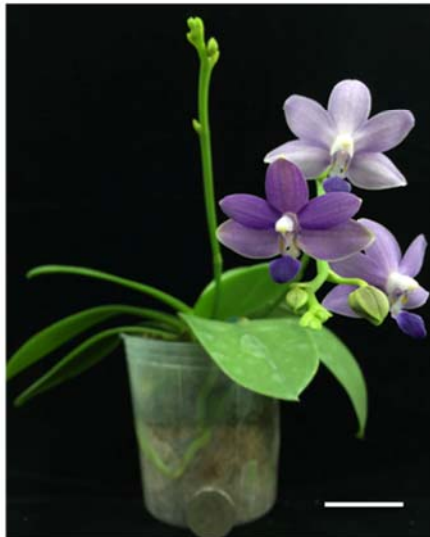

**Additional file 2. Flower color of various flowering development stages of violet-blue *P. Kenneth Schubert* and *P. Purple Martin*.**

(A) *P. Kenneth Schubert* in various flowering development stages range from flower opening (D) and after flower opening 5 days (D+5), 10 days (D+10), 15 days (D+15), and 20 days (D+20). (B) Flowers of *P. Kenneth Schubert* and, (C) the whole plant of *P. Purple Martin*. Scale bar is 2.5 cm.
