# Supplementary material for: Assessment of violet-blue color formation in Phalaenopsis orchids
Source: PubMed Central journal article supplement (PMC7218627; doi:10.1186/s12870-020-02402-7), 2020-05-12
Supplement: 12870_2020_2402_MOESM3_ESM.pdf [file 12870_2020_2402_MOESM3_ESM.pdf]

**Additional file 3. Primers used in this study.**

| Primer name               | 5' → 3' nucleotide sequences          |
|---------------------------|---------------------------------------|
| qRT PCR                   |                                       |
| PhF3'5'H_QPCR_F2          | TTGGCGGAGCACRGTGAGAGTAGAG             |
| PhF3'5'H_QPCR_R2          | CCGGCGATCTTATCAGCCACAA                |
| PhF3'H_QPCR_F2            | GACCACCAGATCGACGGCTACCTA              |
| PhF3'H_QPCR_R2            | GGGGAGGAACCKATCTGGCCG                 |
| PeAHA1_QPCR_F2            | CCCTCTTCAGCGACAAGAGCAGC               |
| PeAHA1_QPCR_R2            | TGACTCCACATGTCCCTTCAATGTATTC          |
| PeAHA2_QPCR_F1            | CTCAGYGGAAAGGCATGGGACAAC              |
| PeAHA2_QPCR_R1            | CATTGAAGACTGATGTAGTCTCAGCG<br>GTT     |
| PeAHA3_QPCR_F1            | ACA ACTTATCACCWACATTTCAAATCT<br>TGTTG |
| PeAHA3_QPCR_R1            | AAAGCGCCGCGGTAAGCTGG                  |
| PeAHA4_QPCR_F1            | TCGTGATACCGTCATCCTAATGGCG             |
| PeAHA4_QPCR_R1            | GATTGAAAGGCAAAAAATGAACTTCT<br>TGGATAT |
| PeAHA5_QPCR_F2            | CACCRCTACCTGATAAGTGGAACCTCA<br>CC     |
| PeAHA5_QPCR_R2            | TCGGTCTGATGAGCTGCATAATAGAATA<br>GA    |
| Gene isolation            |                                       |
| PM_F3'5'H_Xma I _STR(F)   | CCCGGGATGTCCATCTTCCTCATCGCA<br>ACC    |
| PM_F3'5'H_Xma I _STO(R)   | CCCGGGTCAAACACCCCCATACGCCG            |
| PM_F3'H_Xho I _STR(F)     | CTCGAGATGATCGTCGTCAACTCCGCC           |
| PM_F3'H_Xho I _STO(R)     | CTCGAGTCACAAATAAGCCTCCGGTTC<br>AAG    |
| Delp_F3'5'H_Xma I _STR(F) | CCCGGGATGTCTATAAGCCTGTTCTTG           |

|                           |                                     |
|---------------------------|-------------------------------------|
|                           | CTGG                                |
| Delp_F3'5'H_Xma I _STO(R) | CCCGGGTCAGACTACATATGCAGAGGG<br>TGGC |
| 5' and 3' RACE            |                                     |
| F3'5'H_RACE_3RA1          | AGCCCTGCGAGGTAGAAGGTTACCAC          |
| F3'5'H_RACE_3RA2          | AAGACCTGGCTTTTGGTCAACATATGG<br>GC   |
| F3'5'H_RACE_5RA1          | GTCACCAACAGCGGCACCG                 |
| F3'5'H_RACE_5RA2          | TCCATGTCCAGCTCCACCACCCC             |
